# Supplementary material for: A Systematic Approach to Mapping Recessive Disease Genes in Individuals from Outbred Populations
Source: PLoS Genet. 2009 Jan 23;5(1):e1000353. doi: 10.1371/journal.pgen.1000353 (PMC2621355; doi:10.1371/journal.pgen.1000353)
Supplement: Figure S2 — The European “founder” mutation R138Q of NPHS2 occurs on a shared haplotype by descent from a common ancestor. (4.30 MB PDF) [file pgen.1000353.s002.pdf]

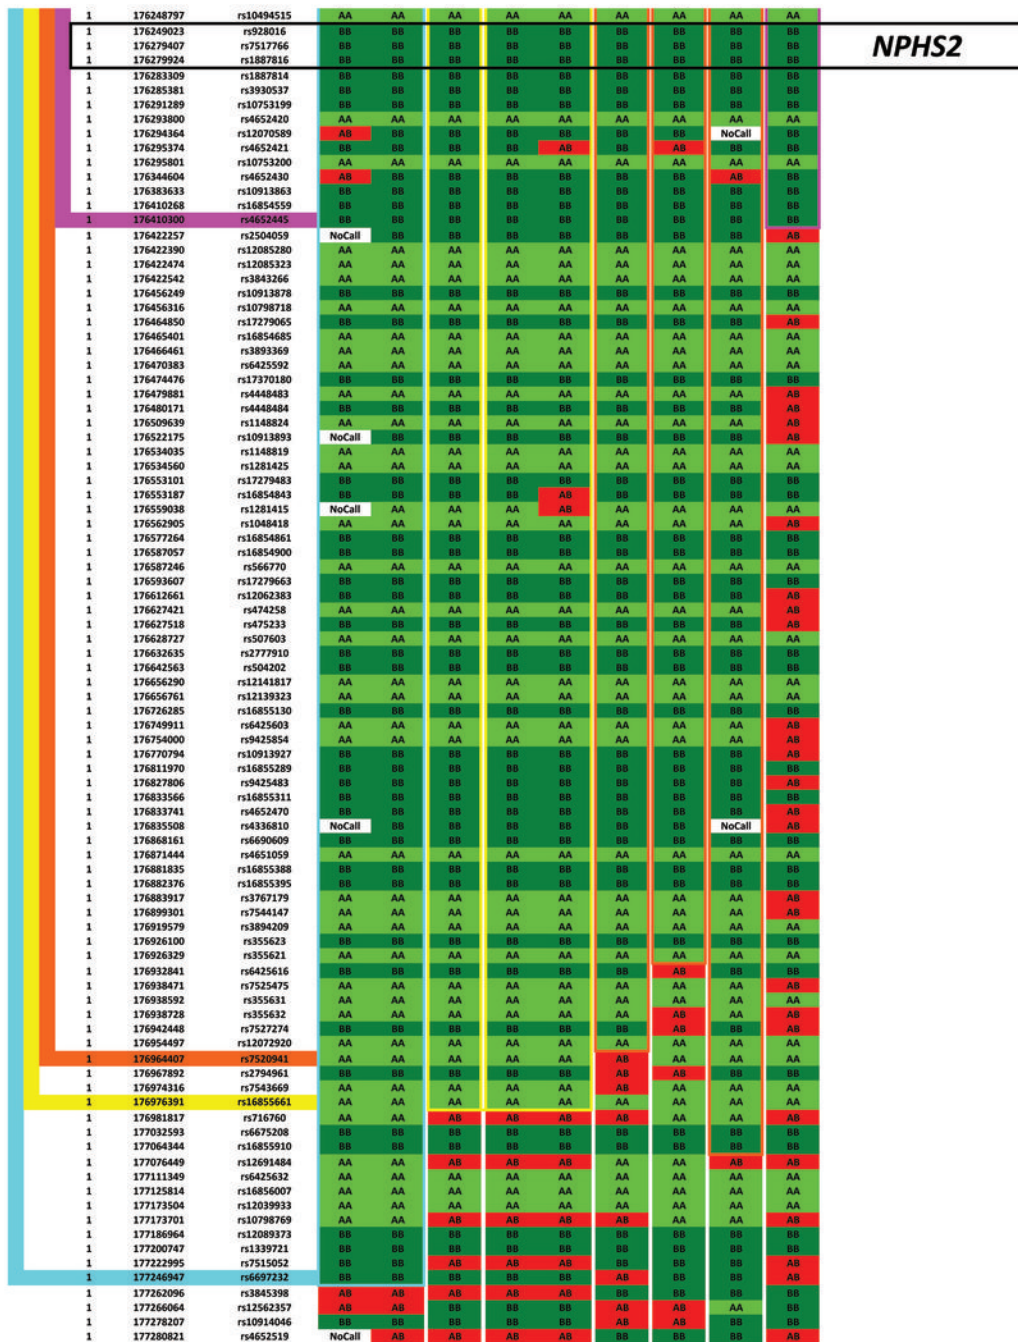

**Supplementary Figure 2. The European "founder" mutation R138Q of *NPFS2* occurs on a shared haplotype by descent from a common ancestor.**

Haplotypes from a 250k SNP array of 7 different families with steroid resistant nephrotic syndrome due to the homozygous European "founder" mutation R138Q of *NPFS2* are shown. Homozygous alleles are on green background (light green for "AA", dark green for "BB"). Heterozygous alleles are on red background. "No calls" by the SNP evaluation software BRLMM are on white background. Continuous segments of homozygosity (that are partially interrupted by rare false heterozygous allele calls) are encased in colored boxes and delimited by same-color brackets on the left with their heterozygous flanking markers indicated in the same color. The position of the *NPFS2* gene is indicated.

Note that all families within the homozygous region share identical homozygous alleles (with the exception of a few false heterozygous allele calls). In this way we demonstrate that the European "founder" mutation R138Q of *NPFS2* does in fact occur by descent from a founder as proposed (Boute et al. 2000). The homozygous intervals measure 2.70 Mb in A1730, 2.3 Mb in A825 and A237 ~1.2 Mb in A646, A1686 and A159, and 0.68 Mb in A887. Whereas the intervals of 2.70 Mb were detectable as a cZLR peak the shorter intervals were not (see **Table 1** and **Figure 3**).
